# Supplementary material
Source: PubMed Central journal article supplement (PMC3365430)

Fig S 8 A

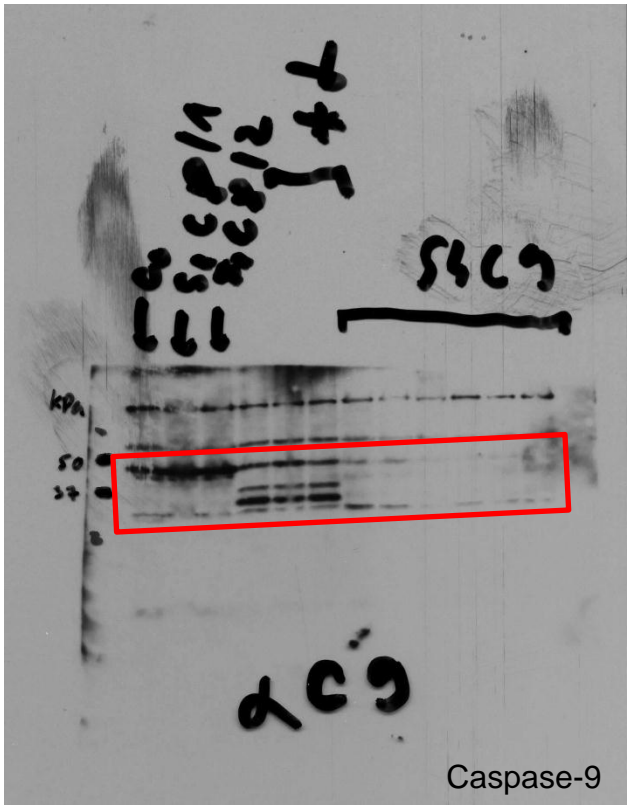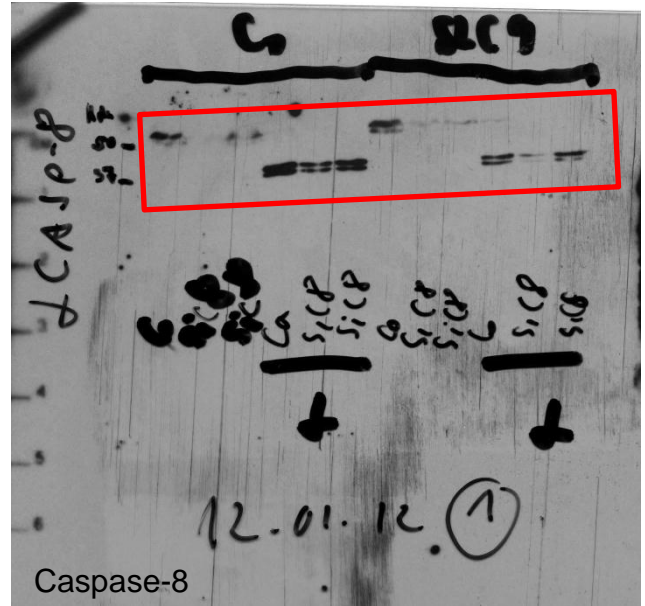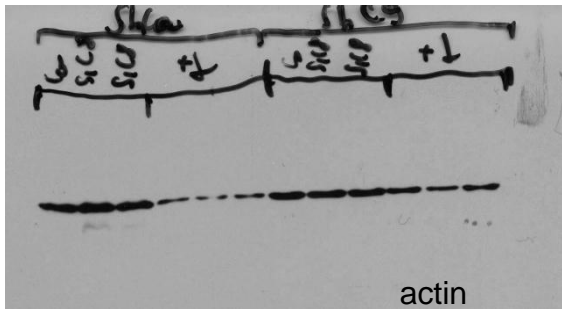

Supplement: emboj201293s10.pdf [file emboj201293s10.pdf]

Fig S9 B

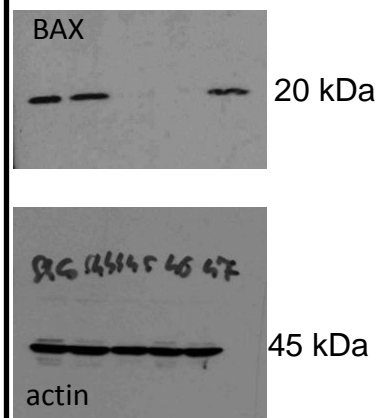

Fig S9 D

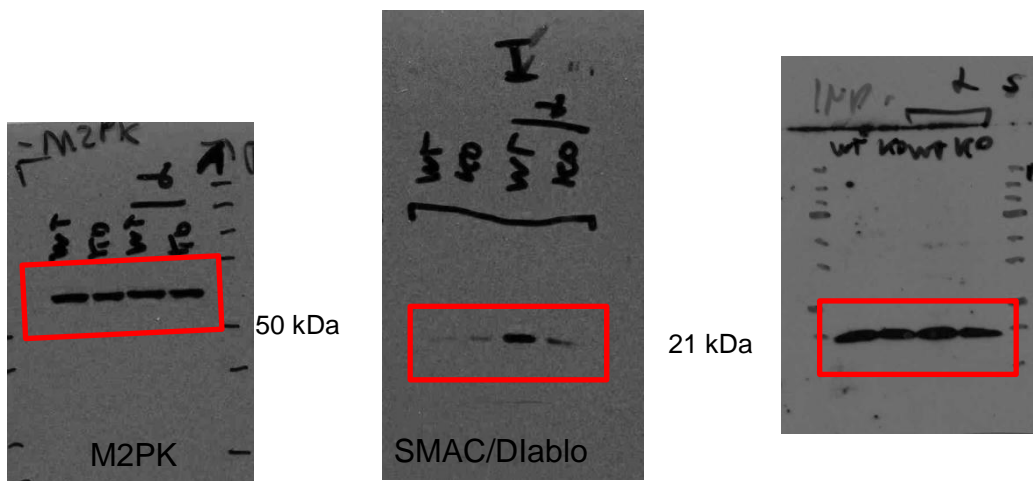

Supplement: emboj201293s11.pdf [file emboj201293s11.pdf]

Fig S 10 A

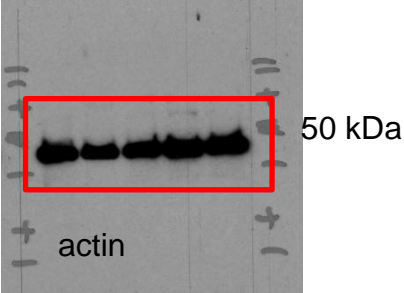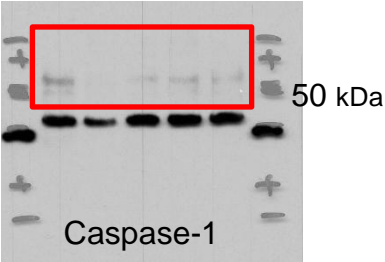

Supplement: emboj201293s12.pdf [file emboj201293s12.pdf]

Fig 1 F

### Caspase-9

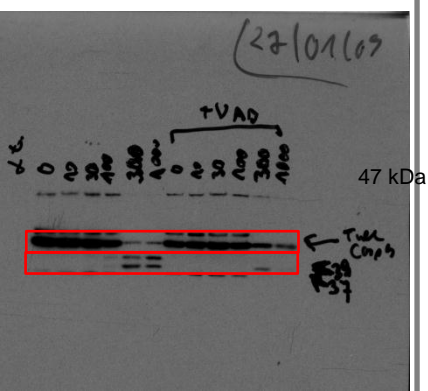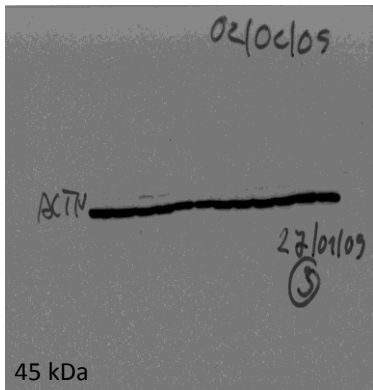

### Caspase-8

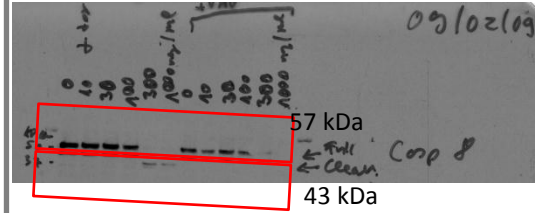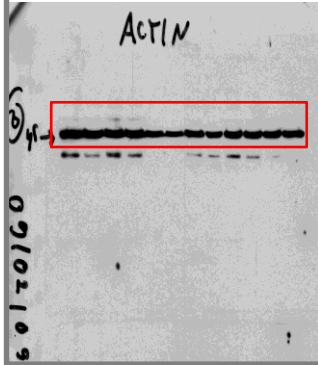

### Caspase-2

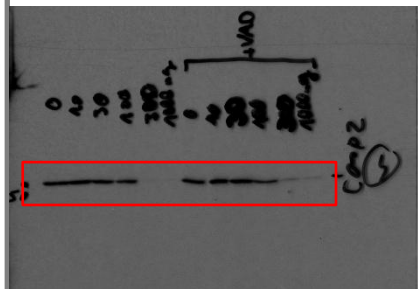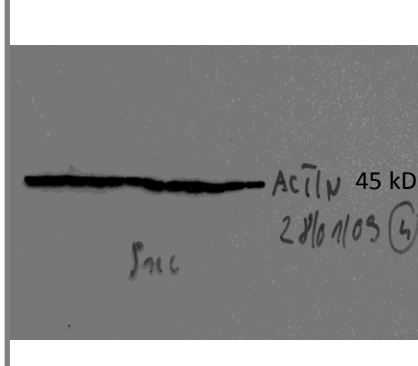

### Caspase-3

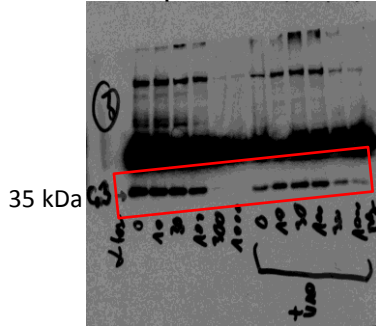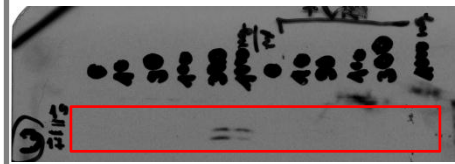

19 kDa  
17 kDa

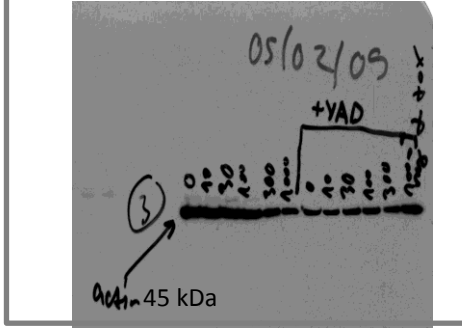

### PARP

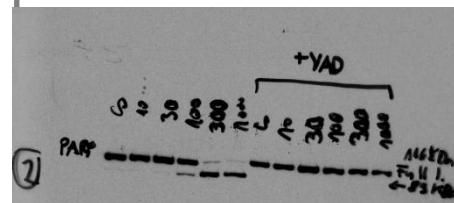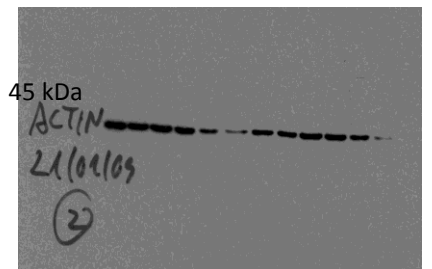

Supplement: emboj201293s2.pdf [file emboj201293s2.pdf]

Fig 2A

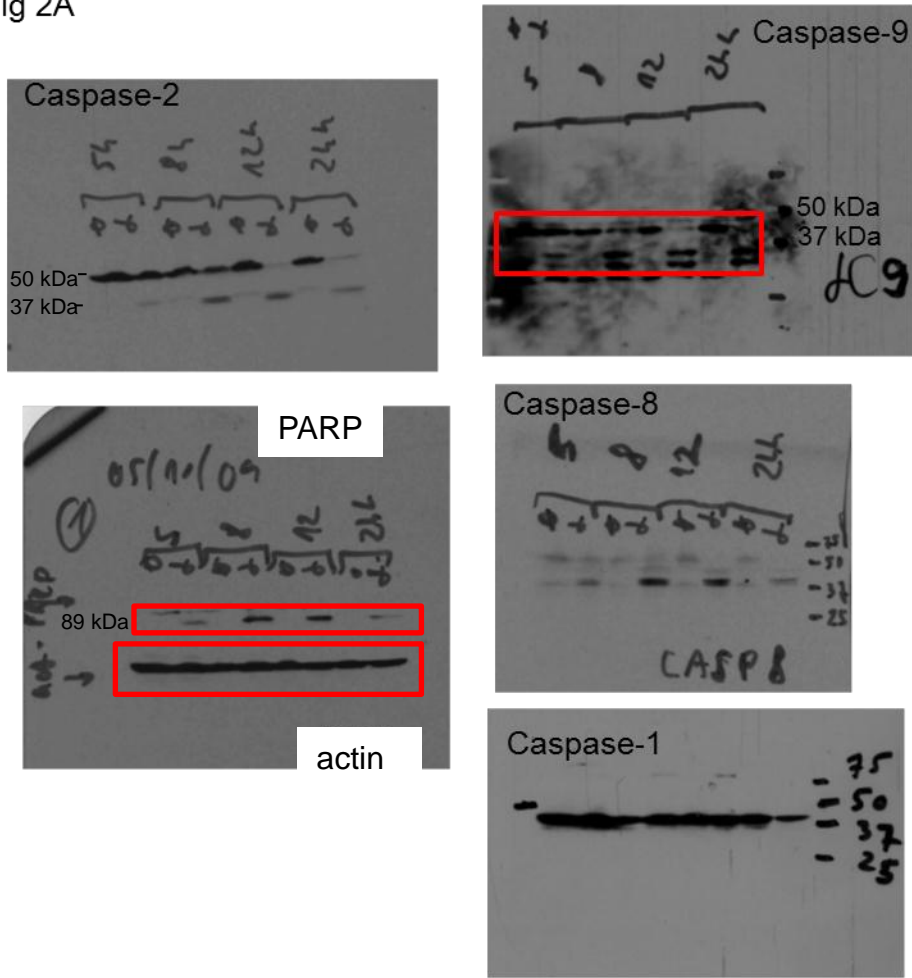

Fig 2C

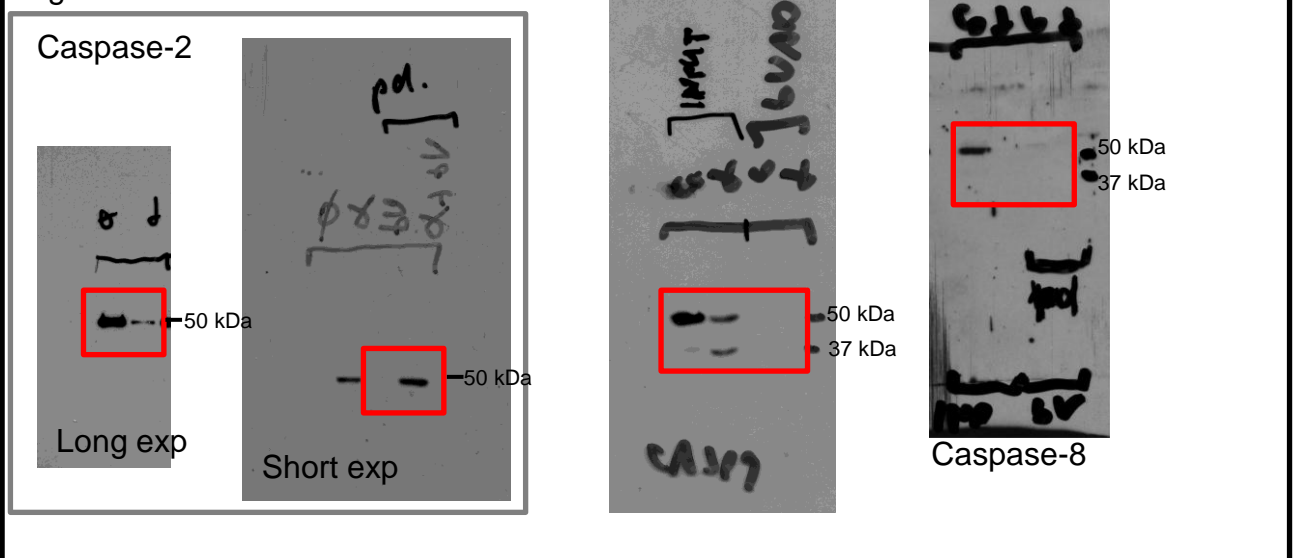

Supplement: emboj201293s3.pdf [file emboj201293s3.pdf]

Fig 3 A

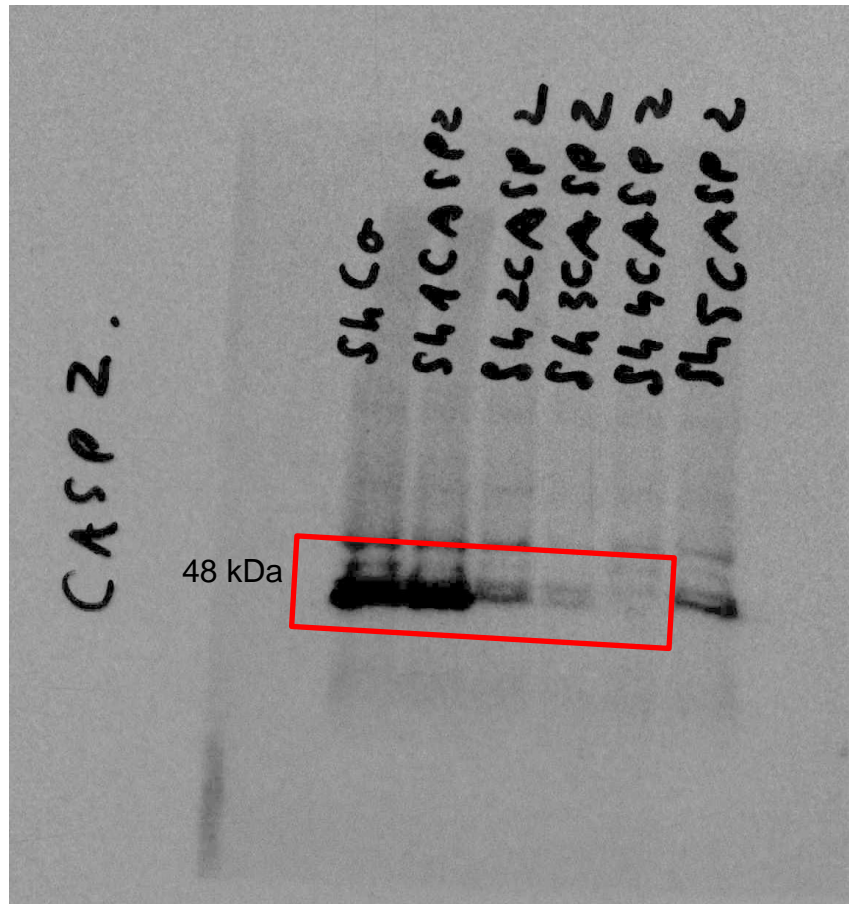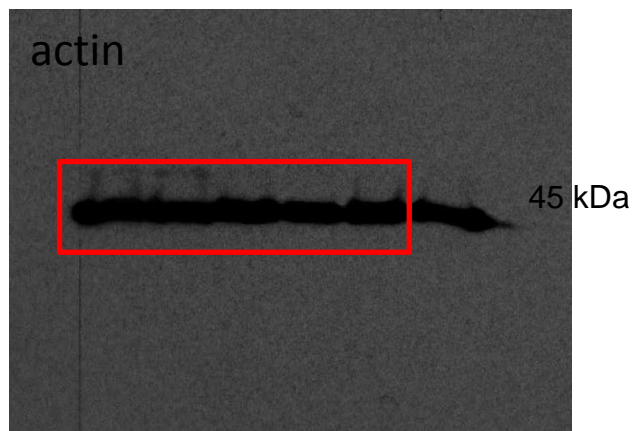

Supplement: emboj201293s4.pdf [file emboj201293s4.pdf]

Fig 4 B

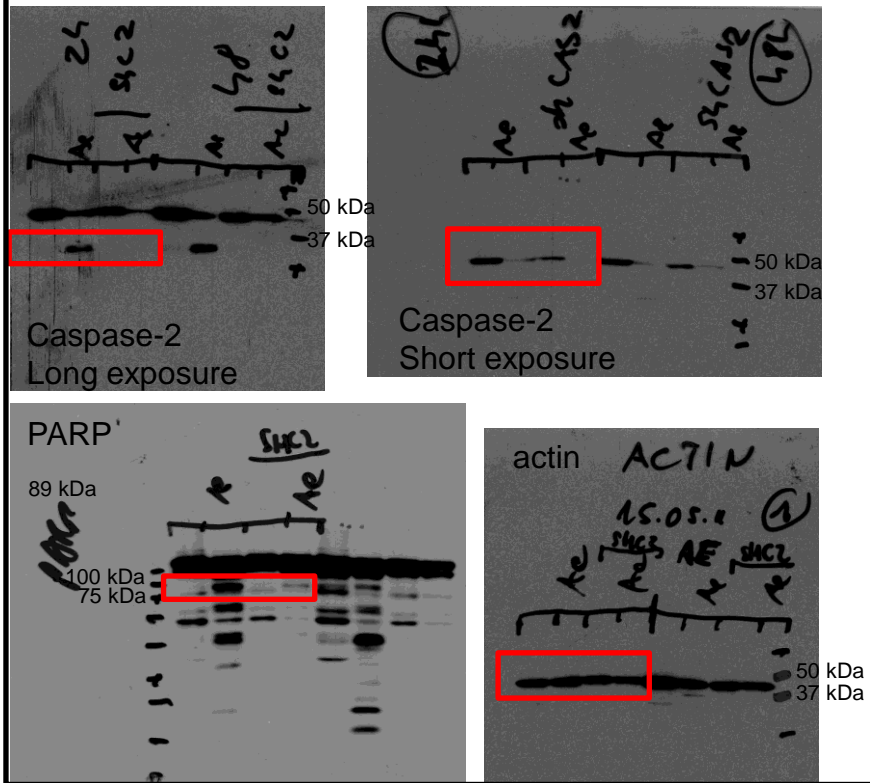

Supplement: emboj201293s5.pdf [file emboj201293s5.pdf]

Fig 5A

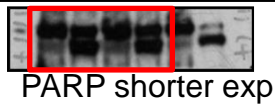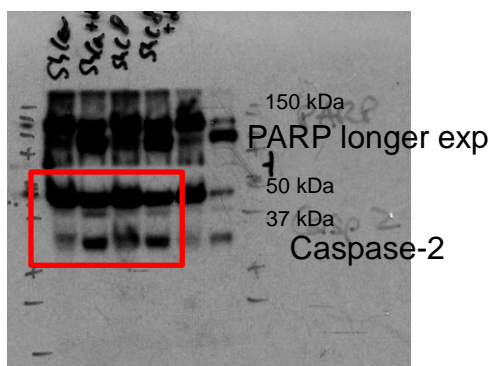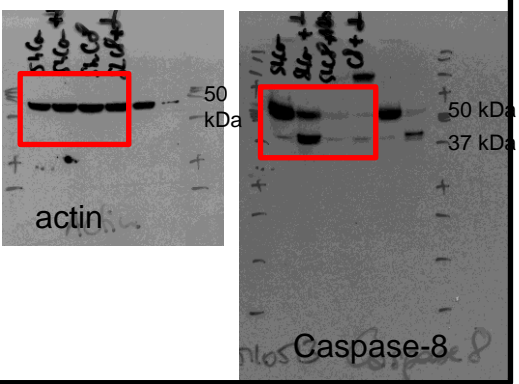

Fig 5B

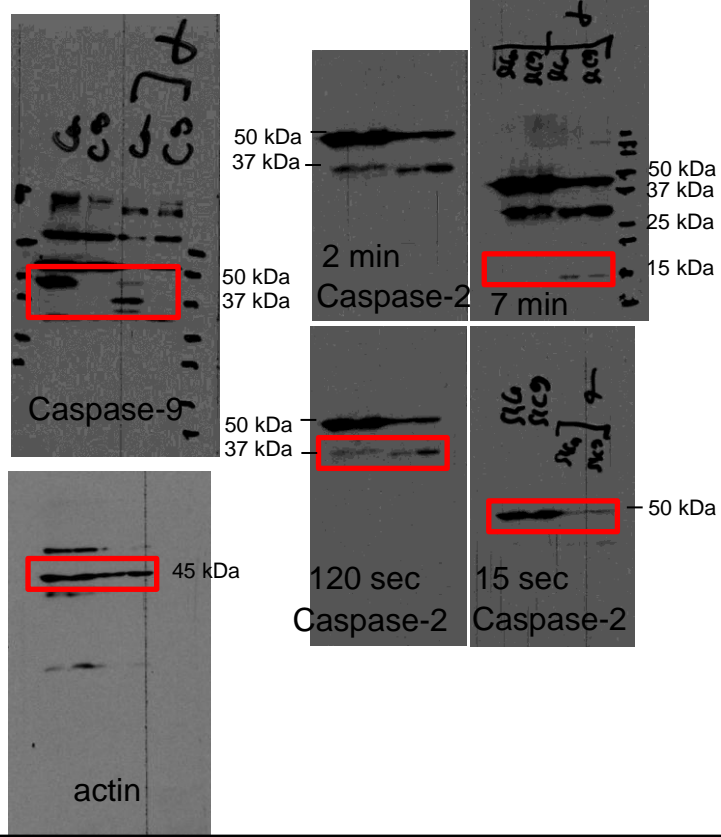

Fig 5C

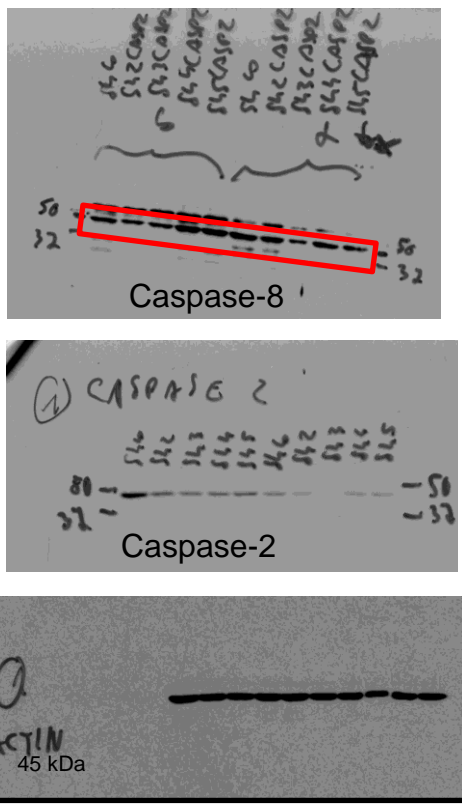

Fig 5D

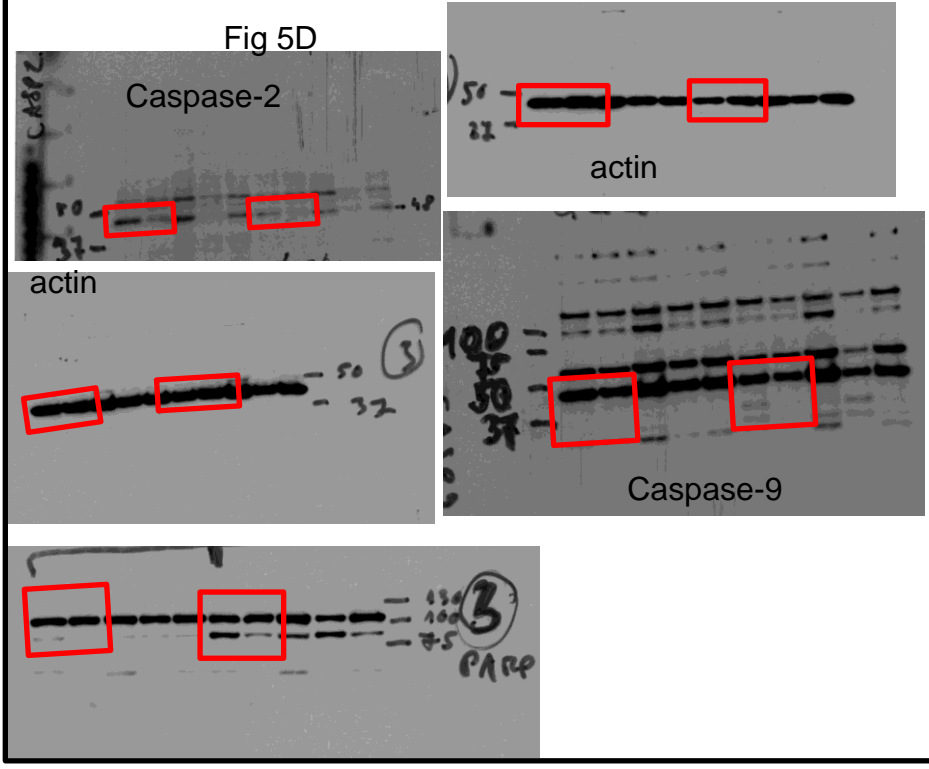

Supplement: emboj201293s6.pdf [file emboj201293s6.pdf]

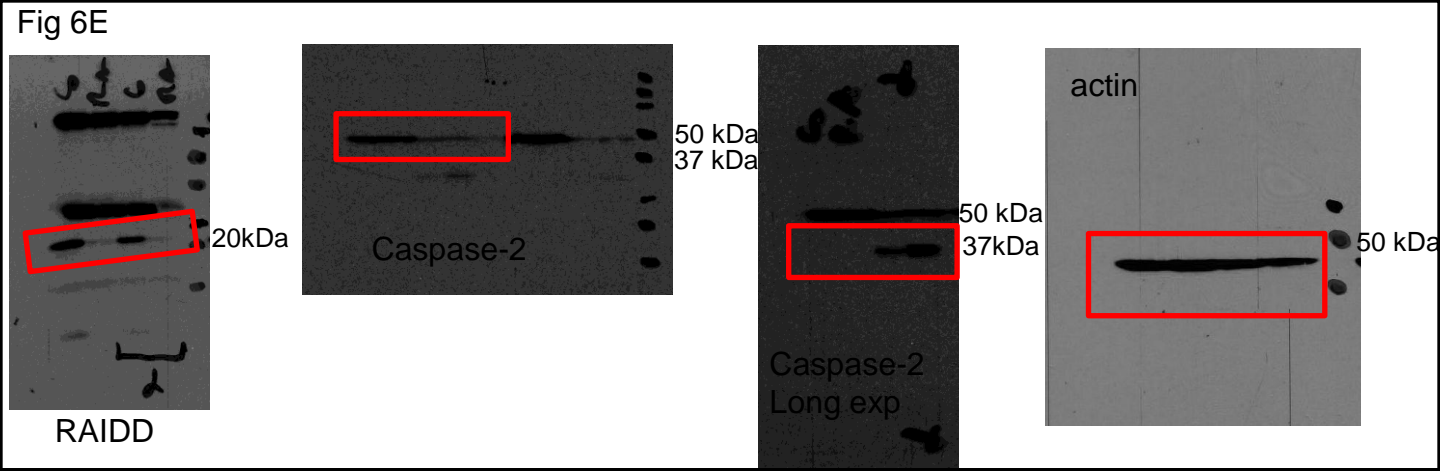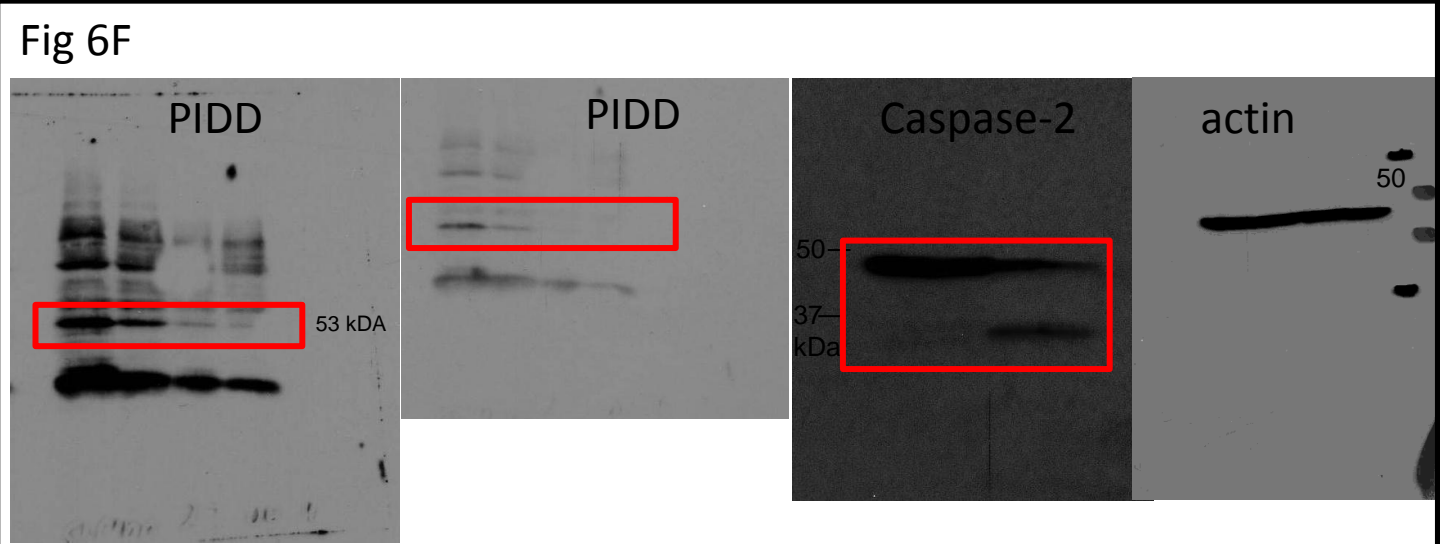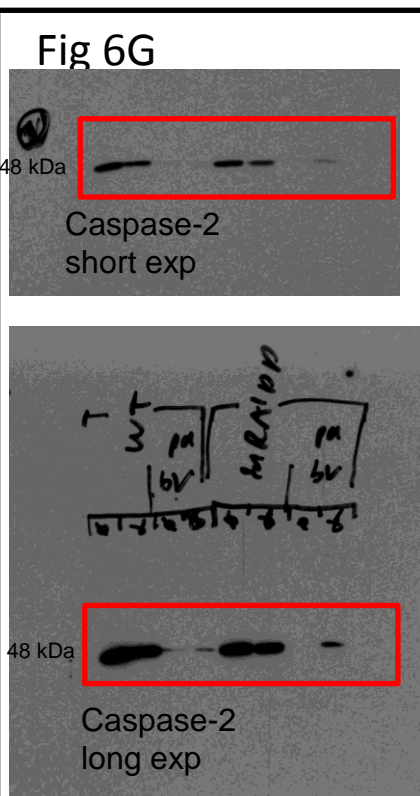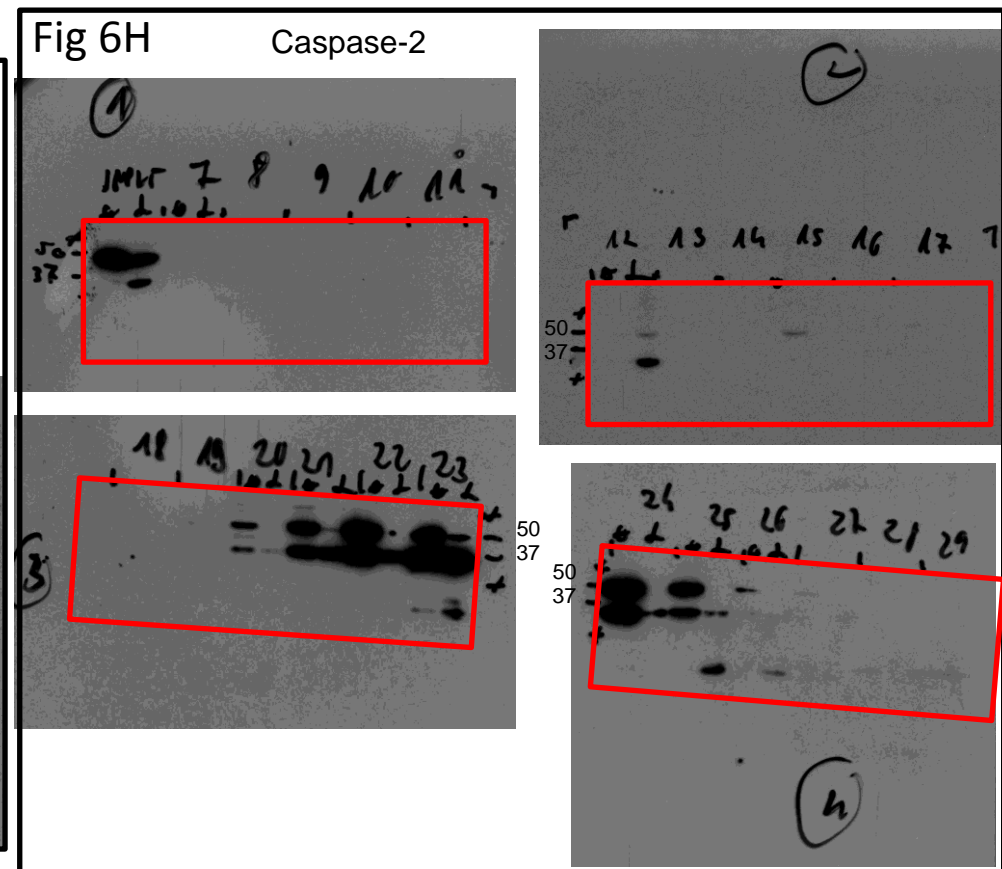

Supplement: emboj201293s7.pdf [file emboj201293s7.pdf]

Fig 7 B

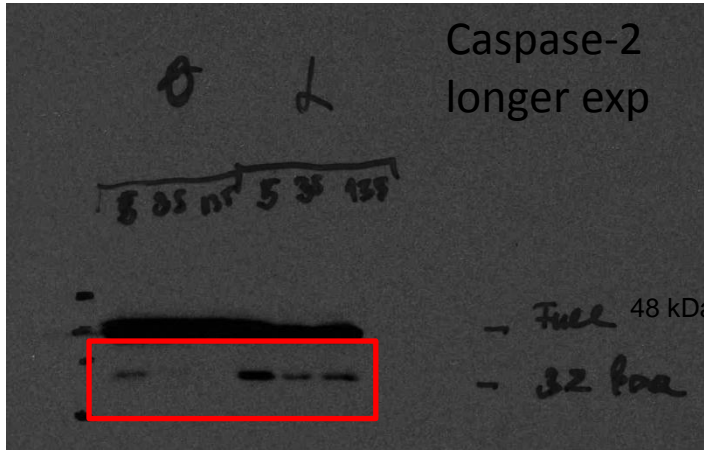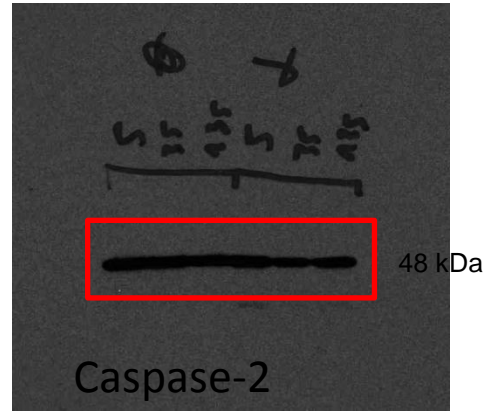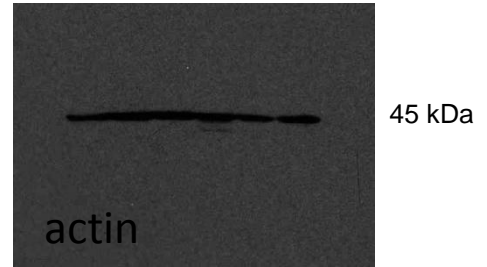

Fig 7 G

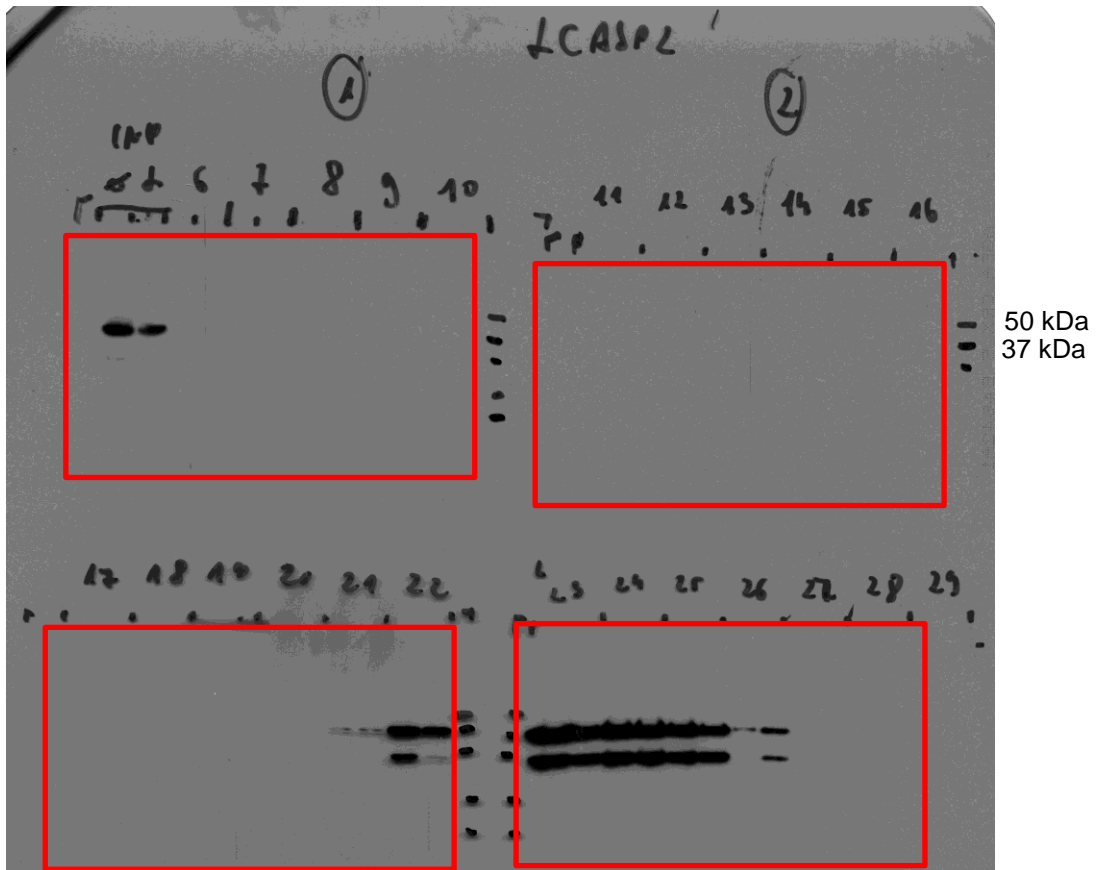

Supplement: emboj201293s8.pdf [file emboj201293s8.pdf]

Fig S 5 B

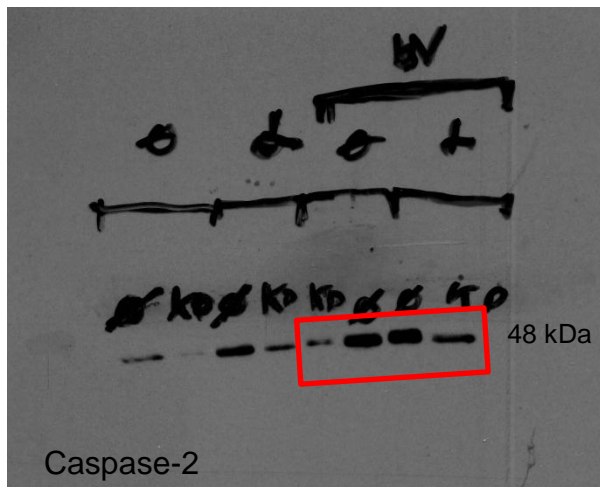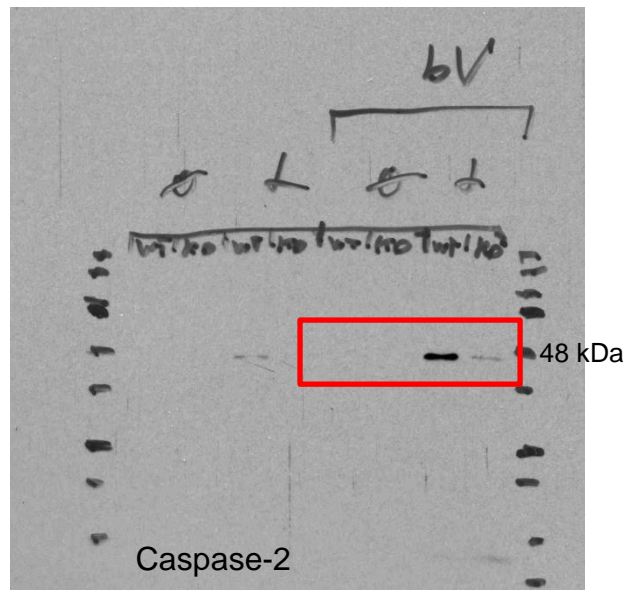

Supplement: emboj201293s9.pdf [file emboj201293s9.pdf]
